# Supplementary material for: Vaccination of chemotherapy patients—effect of guideline implementation
Source: Springer Nature journal article supplement (doi:10.1007/s00520-015-3037-6), 2015-11-26
Supplement: MOESM1 [file 520_2015_3037_MOESM1_ESM.pdf › supplementary_data/520_2015_3037_MOESM1_ESM.pdf]

**The Oxford Cancer Centre has guidelines for vaccination of patients undergoing chemotherapy. To assess how successful these are, it would be helpful if you are able to complete this questionnaire. The information you provide is anonymous and your participation is completely voluntary.**

1. What is your age?

.....years

2. For which type of cancer are you receiving chemotherapy?

.....

3. Are you up to date on your childhood vaccinations?

☐ Yes ☐ No ☐ Unsure

4. Have you received an influenza vaccination ("flu jab") since September 2013?

☐ Yes ☐ No

5. If yes, was this vaccination arranged because of your chemotherapy treatment, or due to another reason? (e.g. asthma, aged 65 years+...)

☐ Chemotherapy ☐ Other reason

6. Have you received a pneumococcal vaccination ("Prevenar13" or "Pneumovax") at any time in the past?

☐ Yes ☐ No ☐ Unsure

7. If yes, was this vaccination arranged because of your chemotherapy treatment, or due to another reason? (e.g. asthma, aged 65 years+...)

☐ Chemotherapy ☐ Other reason

8. Did you receive any guidance from your cancer doctor regarding having vaccinations before or during your chemotherapy treatment?

☐ Yes ☐ No ☐ Unsure

9. Would you have liked to receive guidance from your cancer team regarding having vaccinations before and during chemotherapy?

☐ Yes ☐ No ☐ Indifferent

**Many thanks for your time in filling out this questionnaire**

**Dr Katie Herbert, CT2 / Michelle Toleman, FY2 / Dr David Church, Clinical Lecturer**
