# Supplementary material for: Vaccination of chemotherapy patients—effect of guideline implementation
Source: Springer Nature journal article supplement (doi:10.1007/s00520-015-3037-6), 2015-11-26
Supplement: MOESM2 [file 520_2015_3037_MOESM2_ESM.pdf › supplementary_data/520_2015_3037_MOESM2_ESM.pdf]

### Clinical Audit Protocol

|                                                                                                                                                                                                                                                                                                                                                                                                                                                                                                                                                                                                                                                                                                                                                                                                                                 |                                                                                                                                                                                    |                              |               |
|---------------------------------------------------------------------------------------------------------------------------------------------------------------------------------------------------------------------------------------------------------------------------------------------------------------------------------------------------------------------------------------------------------------------------------------------------------------------------------------------------------------------------------------------------------------------------------------------------------------------------------------------------------------------------------------------------------------------------------------------------------------------------------------------------------------------------------|------------------------------------------------------------------------------------------------------------------------------------------------------------------------------------|------------------------------|---------------|
| <b>Clinical Audit Title:</b>                                                                                                                                                                                                                                                                                                                                                                                                                                                                                                                                                                                                                                                                                                                                                                                                    | Vaccination of chemotherapy patients at the Oxford Cancer Centre                                                                                                                   |                              |               |
| <b>Audit Lead(s) / Designation</b>                                                                                                                                                                                                                                                                                                                                                                                                                                                                                                                                                                                                                                                                                                                                                                                              | Dr Michelle Toleman, FY2<br>Dr David Church, Academic Clinical Lecturer in Medical Oncology                                                                                        |                              |               |
| <b>Contact details</b>                                                                                                                                                                                                                                                                                                                                                                                                                                                                                                                                                                                                                                                                                                                                                                                                          | David Church <a href="mailto:david.church@ouh.nhs.uk">david.church@ouh.nhs.uk</a><br>Michelle Toleman <a href="mailto:michelle.toleman@ouh.nhs.uk">michelle.toleman@ouh.nhs.uk</a> |                              |               |
| <b>Directorage</b>                                                                                                                                                                                                                                                                                                                                                                                                                                                                                                                                                                                                                                                                                                                                                                                                              | Oncology                                                                                                                                                                           |                              |               |
| <b>Start Date</b>                                                                                                                                                                                                                                                                                                                                                                                                                                                                                                                                                                                                                                                                                                                                                                                                               | January 2012                                                                                                                                                                       | <b>Estimated Finish Date</b> | February 2012 |
| <b>Background / Rationale to the Clinical Audit</b><br>(a brief history to the project)                                                                                                                                                                                                                                                                                                                                                                                                                                                                                                                                                                                                                                                                                                                                         |                                                                                                                                                                                    |                              |               |
| <p>Influenza and invasive pneumococcal infections pose substantial risk to patients with cancer receiving chemotherapy. Both diseases are partly preventable by vaccination, and in the UK patients over the age of 65 are routinely invited for immunization by general practitioners. Department of Health Guidelines also recommend that that younger patients with risk factors, including those planned for chemotherapy treatment, should also be vaccinated against influenza and pneumococcal infections. Anecdotal experience suggests that vaccination of this risk group in OUH is infrequent. We plan to conduct a prospective audit of this with a view to developing interventions to improve vaccine uptake in our patient cohort.</p>                                                                           |                                                                                                                                                                                    |                              |               |
| <b>Clinical Audit Aim / Objectives</b><br>(Overall purpose of the project - e.g. improve, enhance, ensure, change, obtain)                                                                                                                                                                                                                                                                                                                                                                                                                                                                                                                                                                                                                                                                                                      |                                                                                                                                                                                    |                              |               |
| <p><b>Aim</b></p> <ul style="list-style-type: none"> <li>To determine the frequency of, and reasons for influenza and pneumococcal vaccination in patients treated with systemic anticancer therapy at the Oxford Cancer Centre</li> </ul> <p><b>Objectives:</b></p> <ul style="list-style-type: none"> <li>To determine the frequency of influenza and pneumococcal vaccination in patients treated with systemic anticancer therapy at the Oxford Cancer Centre</li> <li>To record whether patients treated with systemic chemotherapy who received influenza and pneumococcal vaccination did so because they were planned for this treatment, or for other reasons.</li> <li>To record whether patients treated with systemic chemotherapy received advice regarding vaccination from their treating oncologist.</li> </ul> |                                                                                                                                                                                    |                              |               |

| Reason for audit          |  |                                       |   |
|---------------------------|--|---------------------------------------|---|
| National Clinical Audit   |  | NICE Quality Standard                 |   |
| NICE Guidance             |  | NICE                                  |   |
| Incident/Complaint/ Claim |  | NHSLA criteria                        |   |
| Specified in CCG Contract |  | Other (compliance with DH guidelines) | X |

| Standards                             |          |                                                              |
|---------------------------------------|----------|--------------------------------------------------------------|
| Measure                               | Standard | Evidence                                                     |
| Frequency of influenza vaccination    | 75%      | National frequency of vaccination of >65's / "at risk" cases |
| Frequency of pneumococcal vaccination | 75%      | As above                                                     |

| Methods                          |                                                                                                                                                                                                                                                                                     |
|----------------------------------|-------------------------------------------------------------------------------------------------------------------------------------------------------------------------------------------------------------------------------------------------------------------------------------|
| <b>Data collection</b>           | Prospective                                                                                                                                                                                                                                                                         |
| <b>Case selection</b>            | Patients receiving treatment with systemic chemotherapy on the Oncology Day Treatment Unit at the Churchill Hospital will be provided with an anonymous questionnaire. No selection will be made for cancer type or chemotherapy regimen. Participation will be entirely voluntary. |
| <b>Audit timing and duration</b> | Two week period during January 2012                                                                                                                                                                                                                                                 |
| <b>Sample size</b>               | Over 100 responses                                                                                                                                                                                                                                                                  |

| Outputs                                |                              |
|----------------------------------------|------------------------------|
| Output                                 | To be reviewed / implemented |
| Departmental presentation              | July 2012                    |
| Clinical vaccine guideline development | September 2012               |

**References:**

Current HPA guidance for those with unknown or incomplete immunization status:

<http://www.hpa.org.uk/Topics/InfectiousDiseases/InfectionsAZ/VaccinationImmunisation/Guidelines/>

Department of Health, "The Green Book"

<http://www.dh.gov.uk/en/Publichealth/Immunisation/Greenbook/index.htm>

US/CDC immunisation recommendations: <http://www.immunize.org/catg.d/p2011.pdf>

Utility of Influenza Vaccine for Oncology Patients. Pollyea et al. J. Clin. Onc. 28: 2481-2490.

Vaccination of Oncology Patients: An effective Tool and an Opportunity Not to Be Missed.

The Oncologist. 17:1-2.
